# Supplementary material for: Autonomic Dysfunction Contributes to Impairment of Cerebral Autoregulation in Patients with Epilepsy
Source: MDPI journal article supplement (doi:10.3390/jpm11040313), 2021-04-17
Supplement: s1 [file s1]

Table S1. Modified composite autonomic scoring scale

| Modified Composite Autonomic Scoring Scale (mCASS) |                                                                                                                                                                                                                                                                                                                                                                                                                                                                                                                               |
|----------------------------------------------------|-------------------------------------------------------------------------------------------------------------------------------------------------------------------------------------------------------------------------------------------------------------------------------------------------------------------------------------------------------------------------------------------------------------------------------------------------------------------------------------------------------------------------------|
| <b>Sudomotor</b>                                   | (Q-sweat volume)                                                                                                                                                                                                                                                                                                                                                                                                                                                                                                              |
| <b>0</b>                                           | Normal                                                                                                                                                                                                                                                                                                                                                                                                                                                                                                                        |
| <b>1</b>                                           | Any of the following:<br>Single Q-Sweat site abnormal<br>Length-dependent pattern (distal sweat volume < 1/3 of proximal value)<br>Persistent sweat activity at foot                                                                                                                                                                                                                                                                                                                                                          |
| <b>2</b>                                           | Any of the following:<br>Single site < 50% of lower limit<br>Two or more sites reduced                                                                                                                                                                                                                                                                                                                                                                                                                                        |
| <b>3</b>                                           | Two or more sites < 50% of lower limit                                                                                                                                                                                                                                                                                                                                                                                                                                                                                        |
| <b>Cardiovagal</b>                                 | (Deep breathing + Valsalva heart rate)                                                                                                                                                                                                                                                                                                                                                                                                                                                                                        |
| <b>0</b>                                           | Normal                                                                                                                                                                                                                                                                                                                                                                                                                                                                                                                        |
| <b>1</b>                                           | HRDB mildly reduced but > 50% of minimum                                                                                                                                                                                                                                                                                                                                                                                                                                                                                      |
| <b>2</b>                                           | HRDB reduced to < 50% of minimum or HRDB + VR reduced                                                                                                                                                                                                                                                                                                                                                                                                                                                                         |
| <b>3</b>                                           | Both HRDB and VR reduced to < 50% of minimum                                                                                                                                                                                                                                                                                                                                                                                                                                                                                  |
| <b>Adrenergic</b>                                  | (Valsalva + Tilt BP)                                                                                                                                                                                                                                                                                                                                                                                                                                                                                                          |
| <b>0</b>                                           | Normal                                                                                                                                                                                                                                                                                                                                                                                                                                                                                                                        |
| <b>1</b>                                           | Any of the following:<br>Valsalva maneuver:<br>Phase II <sub>e</sub> reduction < 40 or > 20 mmHg MBP (30–40 if > 50 years)<br>Phase II <sub>L</sub> does not return to baseline<br>Pulse pressure reduction to ≤ 50% of baseline<br>HUT:<br>Excessive oscillations in MBP (> 20mmHg)<br>Fall in pulse pressure > 50%<br>Transient fall in SBP > 20mmHg with recovery within 1 min<br>Systolic BP reduction ≥ 20 mmHg beyond 1 min<br>Diastolic BP reduction ≥ 10 mmHg beyond 1 min<br>Overshoot ≥ 20 mmHg following tilt back |
| <b>2</b>                                           | Any of the following:<br>Valsalva maneuver:<br>Phase II <sub>e</sub> > 40 mmHg MBP<br>Score of 1 from Valsalva maneuver + HUT:<br>Transient fall in SBP > 30 mmHg, recovery within 2 min<br>Systolic BP reduction ≥ 20 mmHg beyond 1 min<br>Diastolic BP reduction ≥ 10 mmHg beyond 1 min                                                                                                                                                                                                                                     |
| <b>3</b>                                           | Valsalva maneuver:<br>Phase II <sub>e</sub> reduction > 40 mmHg + absent II <sub>L</sub> and IV                                                                                                                                                                                                                                                                                                                                                                                                                               |
| <b>+1</b>                                          | HUT:                                                                                                                                                                                                                                                                                                                                                                                                                                                                                                                          |

---

SBP reduction  $\geq 30$  mmHg beyond 2 min, sustained for  $\geq 2$  min

---

Abbreviations: HRDB, heart rate response to deep breathing; VR, Valsalva ratio; BP, blood pressure; MBP, mean blood pressure; HUT, head up tilt; SBP, systolic blood pressure; DBP, diastolic blood pressure.

Table S2: The comparison of the serial mean arterial pressure, middle cerebral artery velocity and heart rate detected in 5 min head-up tilting tests in patients with epilepsy and the controls.

| Time of Recorded    |                | MAP (mmHg)         | MCAv (cm/sec)     | HR (bpm)          | CVR (mmHg × sec/cm) |
|---------------------|----------------|--------------------|-------------------|-------------------|---------------------|
| Baseline            | Controls       | 86.0 (77.3, 97.5)  | 62.0 (49.0, 83.0) | 70.0 (64.5, 74.5) | 1.32 (1.08, 1.93)   |
|                     | Patients       | 89.3 (82.3, 96.8)  | 64.0 (50.0, 82.0) | 72.0 (64.5, 76.5) | 1.39 (1.04, 1.86)   |
|                     | <i>p</i> value | 0.186              | 0.712             | 0.449             | 0.705               |
| 1 <sup>st</sup> min | Control        | 93.0 (83.5, 102.2) | 57.0 (48.5, 71.0) | 76.0 (70.0, 82.0) | 1.58 (1.21, 2.02)   |
|                     | Patients       | 91.3 (85.5, 98.7)  | 62.0 (44.0, 76.0) | 79.0 (69.0, 86.0) | 1.60 (1.19, 2.05)   |
|                     | <i>p</i> value | 0.665              | 0.916             | 0.406             | 0.792               |
| 2 <sup>nd</sup> min | Controls       | 93.0 (83.3, 101.0) | 59.0 (47.0, 74.0) | 77.0 (71.5, 86.5) | 1.54 (1.26, 2.06)   |
|                     | Patients       | 93.7 (84.8, 99.2)  | 60.0 (43.5, 79.0) | 80.5 (72.0, 87.0) | 1.35 (1.20, 1.46)   |
|                     | <i>p</i> value | 0.968              | 0.721             | 0.561             | 0.004*              |
| 3 <sup>rd</sup> min | Controls       | 92.0 (83.7, 99.0)  | 59.0 (47.0, 75.0) | 80.0 (75.0, 90.0) | 1.51 (1.21, 2.02)   |
|                     | Patients       | 93.0 (83.3, 100.8) | 60.5 (45.2, 81.2) | 81.0 (73.2, 90.0) | 1.53 (1.12, 2.03)   |
|                     | <i>p</i> value | 0.785              | 0.693             | 0.928             | 0.932               |
| 5 <sup>th</sup> min | Controls       | 94.3 (84.0, 102.0) | 59.0 (46.0, 73.0) | 82.0 (77.0, 89.0) | 1.50 (1.28, 2.02)   |
|                     | Patients       | 92.7 (83.8, 98.7)  | 58.0 (41.0, 80.0) | 80.5 (72.0, 91.0) | 1.65 (1.17, 2.16)   |
|                     | <i>p</i> value | 0.493              | 0.956             | 0.510             | 0.897               |
| Ending              | Controls       | 87.0 (80.8, 95.7)  | 61.0 (48.0, 78.5) | 67.0 (61.5, 74.5) | 1.37 (1.06, 1.98)   |
|                     | Patients       | 88.3 (82.7, 94.8)  | 64.0 (45.5, 78.5) | 70.0 (64.5, 76.0) | 1.40 (1.05, 2.02)   |
|                     | <i>p</i> value | 0.560              | 0.692             | 0.121             | 0.593               |

Values are presented as median (IQR).

Abbreviations: MAP, mean arterial pressure; MCAv, middle cerebral artery velocity; HR, heart rate; CVR, cerebrovascular resistance.

\**p* < 0.05 means significant difference between the patients with epilepsy and the controls using the Mann-Whitney U test.
